# Supplementary material for: Consistency of global carbon budget between concentration- and emission-driven historical experiments simulated by CMIP6 Earth system models and suggestions for improved simulation of CO 2 concentration
Source: Copernicus journal article supplement (doi:10.5194/bg-22-1447-2025), 2025-03-17
Supplement: Supplementary file 2 [file bg-22-1447-2025-supplement.zip]

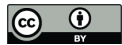

## *Supplement of*

# **Consistency of global carbon budget between concentration- and emission-driven historical experiments simulated by CMIP6 Earth system models and suggestions for improved simulation of CO<sub>2</sub> concentration**

**Tomohiro Hajima et al.**

*Correspondence to:* Tomohiro Hajima (hajima@jamstec.go.jp)

- bg-22-1447-2025-supplement-title-page.pdf
- Hajima\_et\_al\_supplement\_rev\_v04.docx
- data.sm.v241203
  - data.sm.ACCESS-ESM1-5.txt
  - data.sm.CESM2.txt
  - data.sm.CMCC-ESM2.txt
  - data.sm.CNRM-ESM2-1.txt
  - data.sm.CanESM5-CanOE.txt
  - data.sm.CanESM5.txt
  - data.sm.EC-Earth3-CC.txt
  - data.sm.GFDL-ESM4.txt
  - data.sm.IPSL-CM6A-LR.txt
  - data.sm.MIROC-ES2L.txt
  - data.sm.MPI-ESM1-2-LR.txt
  - data.sm.MRI-ESM2-0.txt
  - data.sm.NorESM2-LM.txt
  - data.sm.UKESM1-0-LL.txt
  - readme.txt
- fig.S2.pdf

The copyright of individual parts of the supplement might differ from the article licence.
