# Supplementary figures and images for: Consistency of global carbon budget between concentration- and emission-driven historical experiments simulated by CMIP6 Earth system models and suggestions for improved simulation of CO 2 concentration
Source: Copernicus journal article supplement (doi:10.5194/bg-22-1447-2025), 2025-03-17

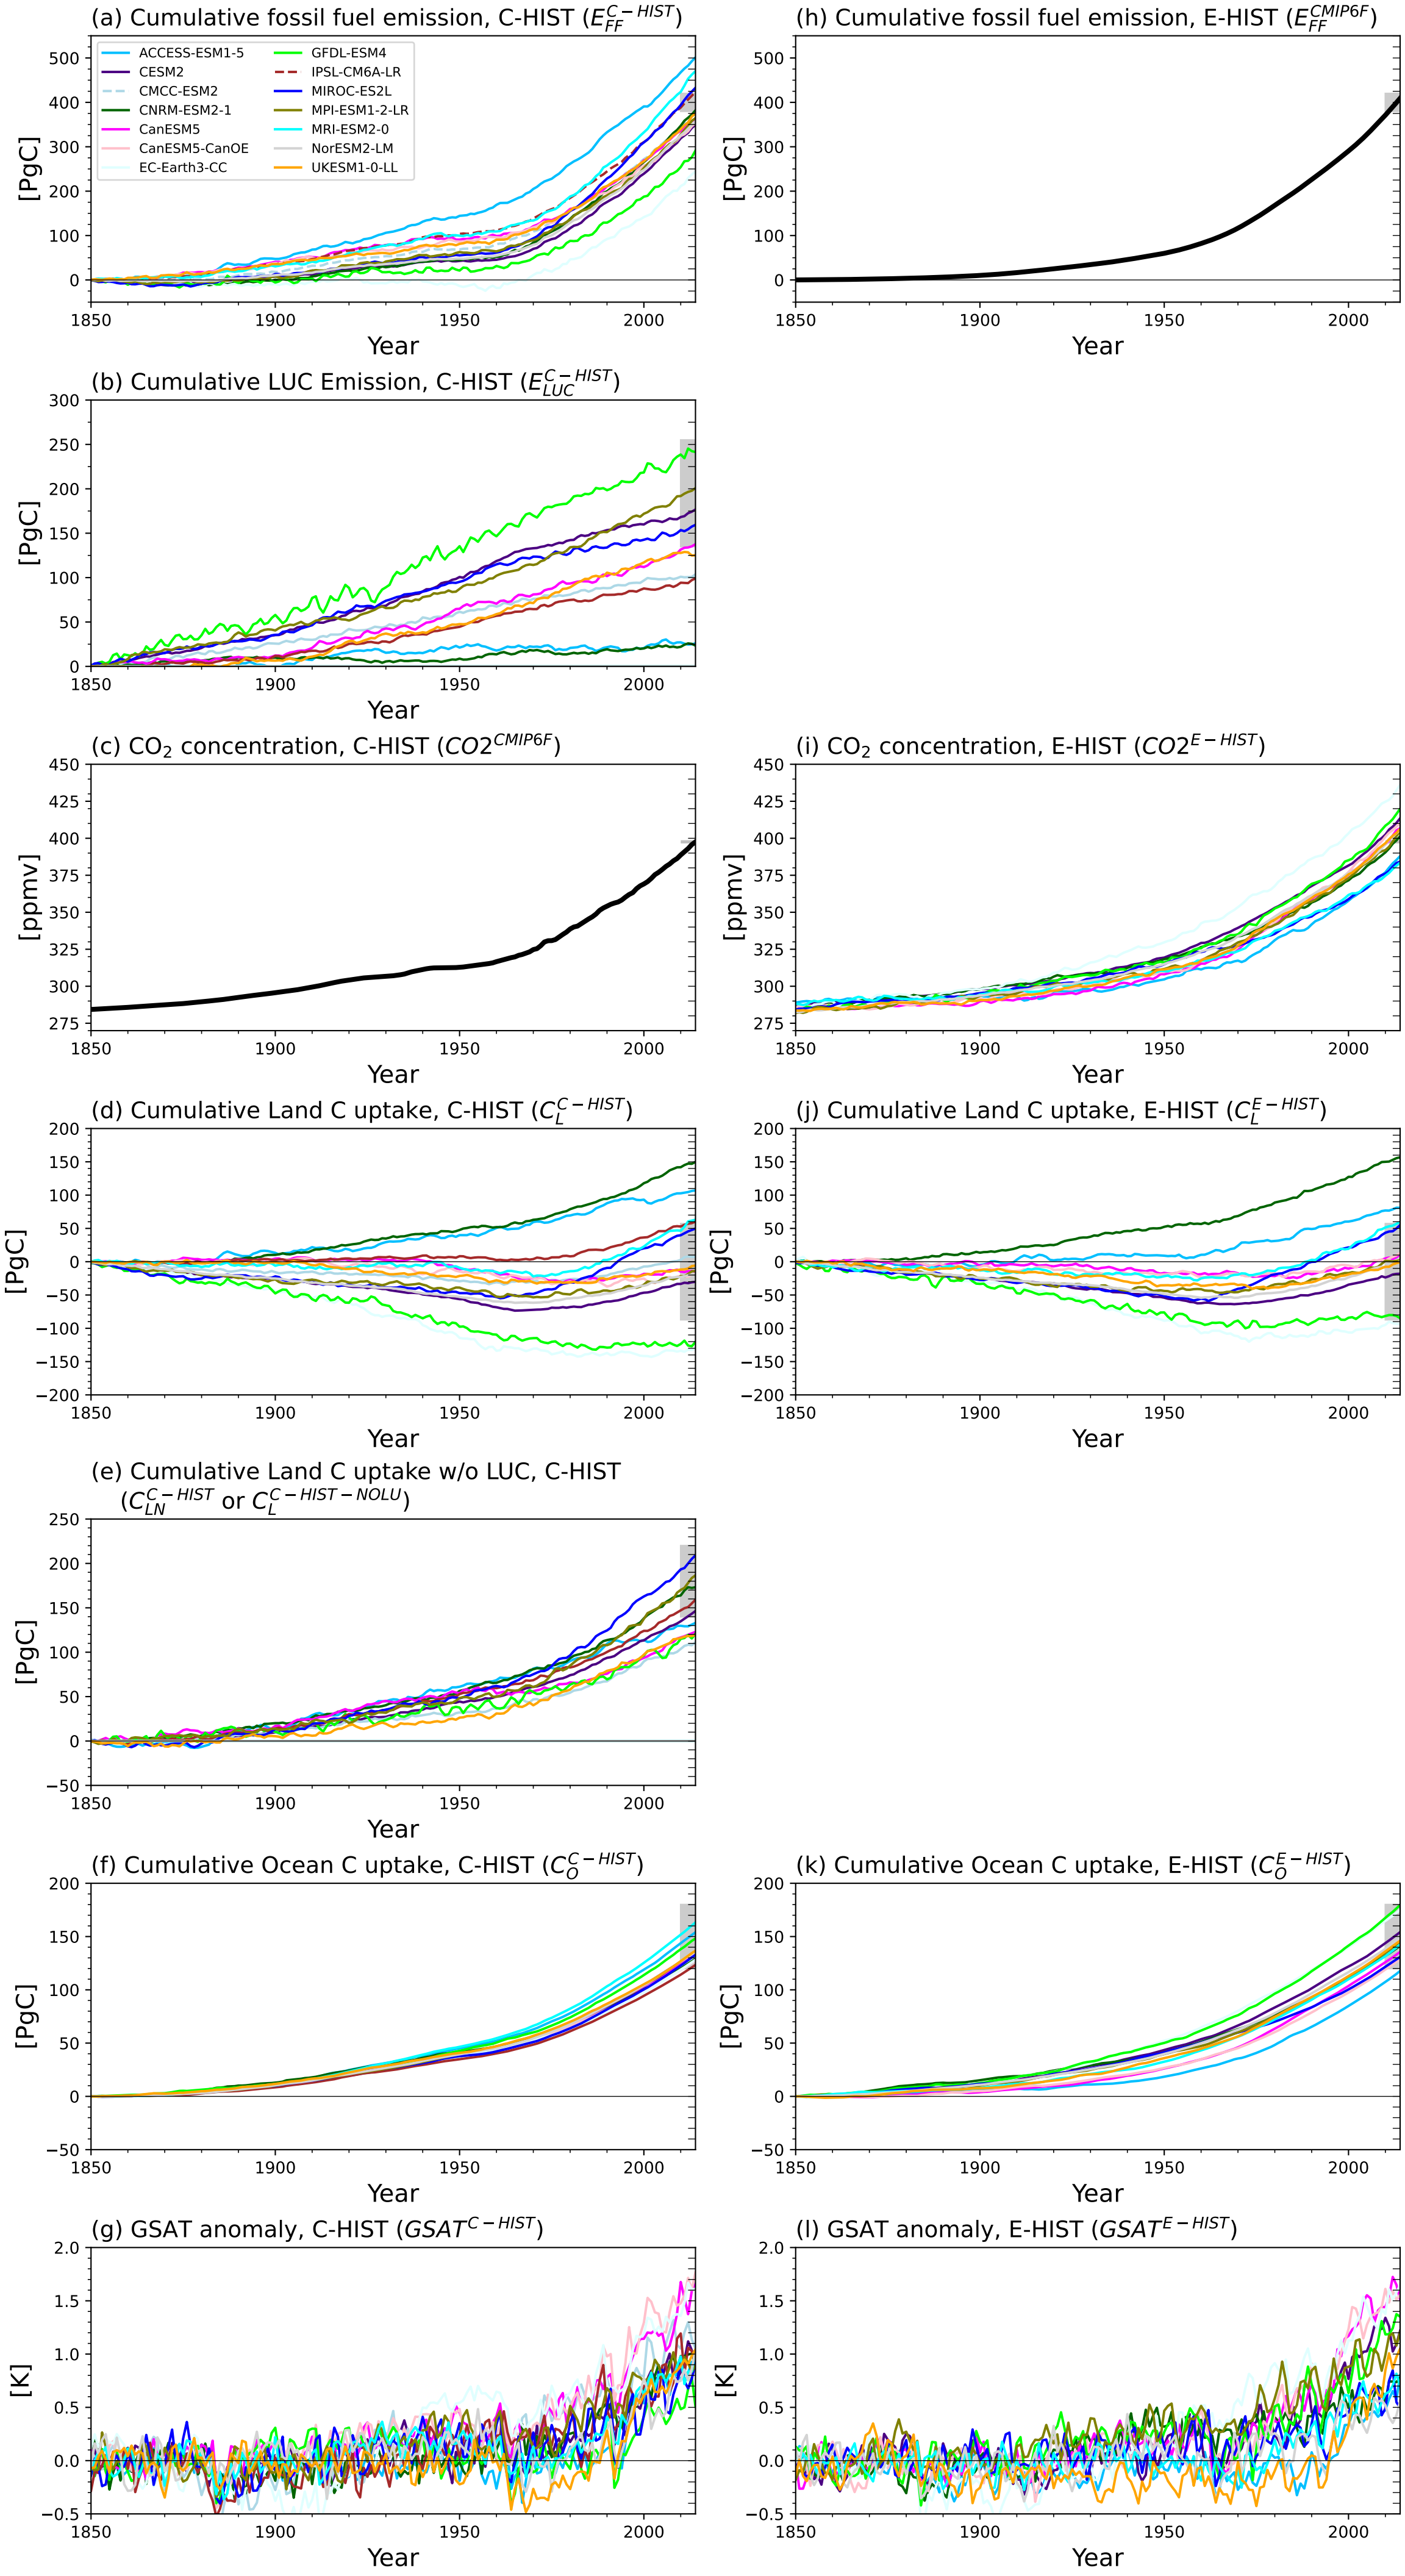

Supplement: Supplementary file 1 [file bg-22-1447-2025-supplement.zip]
